# Supplementary material
Source: PubMed Central journal article supplement (PMC1693814)
Supplement: pnas_0601505103_8.pdf [file pnas_0601505103_8.pdf]

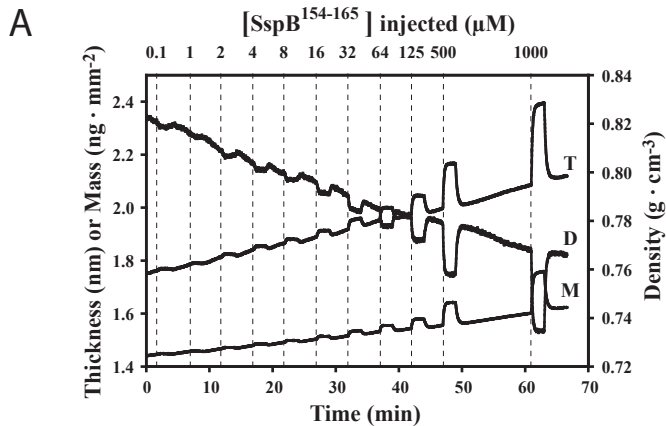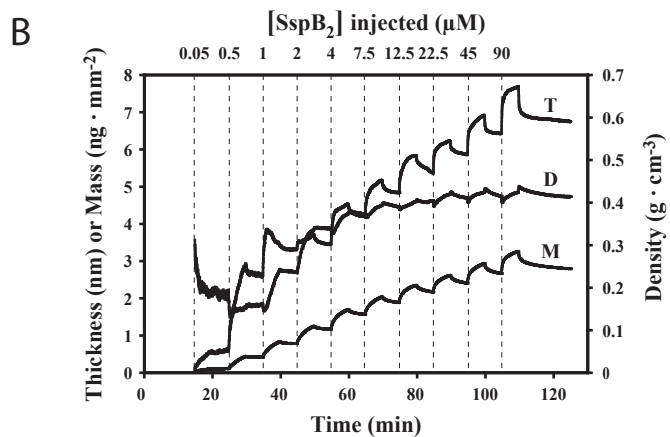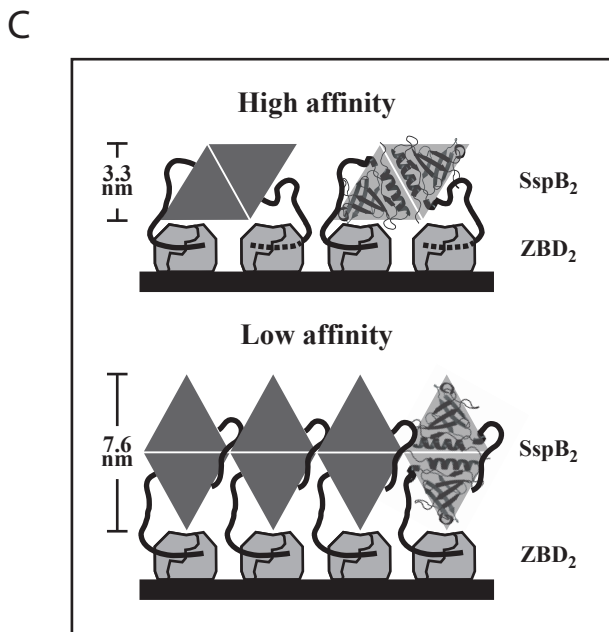

**D**

|                                                  | ZBD <sub>2</sub> | SspB <sub>2</sub><br>High<br>affinity | SspB <sub>2</sub><br>Low<br>affinity |
|--------------------------------------------------|------------------|---------------------------------------|--------------------------------------|
| Area<br>( $\text{\AA}^2 \text{ molecule}^{-1}$ ) | 1959             | 3768                                  | 1908                                 |
