# Supplementary material
Source: PubMed Central journal article supplement (PMC1693814)

A

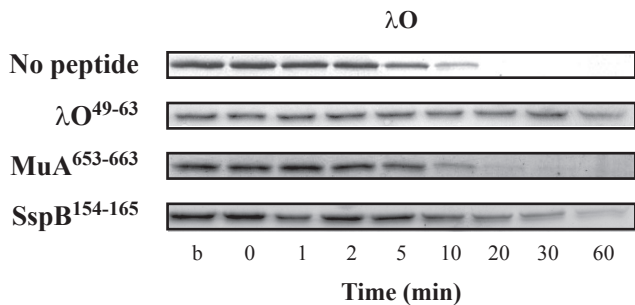

B

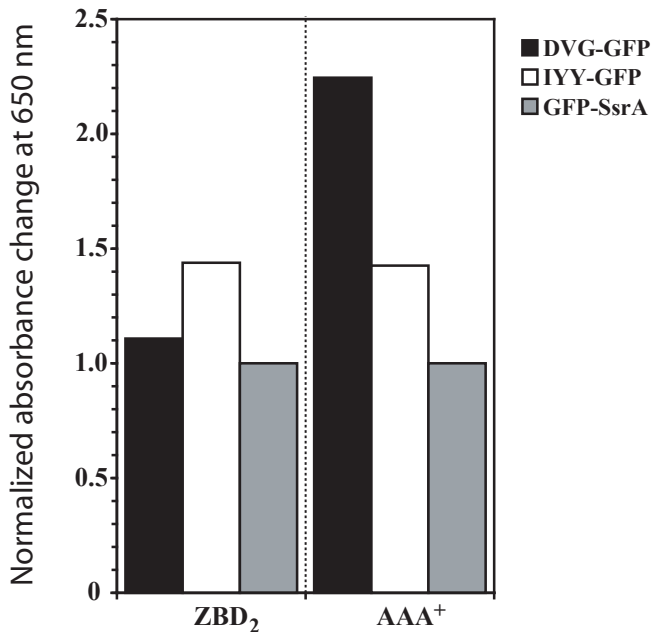

Supplement: pnas_0601505103_4.pdf [file pnas_0601505103_4.pdf]
